# Supplementary material for: The Tibetan medicine Zuotai influences clock gene expression in the liver of mice
Source: PeerJ. 2016 Jan 26;4:e1632. doi: 10.7717/peerj.1632 (PMC4741069; doi:10.7717/peerj.1632)
Supplement: Supplemental Information 2 — RORa raw data. [file peerj-04-1632-s002.xlsx]

## Sheet: 0
			Liv-B-actin					B-actin					RORa
		Group					average	2015-09-17	average	dCt	2^(-dCt)	Old	New	average	dCt	2^(-dCt)	%B-actinx100	Mean	SEM
	A03	10-Cont	18.2357	18.8895	19.0141	19.3075	18.7131	19.4741	19.0936	2.0936	0.234295	25.4242	24.4277	24.9259	7.92595	0.00411198	175.505	272.098	38.1209		Cont		佐太
	A04		17.7402	17.9786	18.1217	18.377	17.9469	18.3362	18.1415	1.14154	0.453274	22.9811	22.8628	22.9219	5.92194	0.0164937	363.879			6	367.506	59.9502	297.028	34.7835			2.58287
	A05		17.3937	18.21	18.3044	18.8204	17.9693	18.5086	18.239	1.23897	0.423676	22.9068	23.411	23.1589	6.15888	0.0139956	330.338			10	272.098	38.1209	138.008	42.4072			2.21384
	A06		18.1557	17.8527	18.513	19.0181	18.1738	17.5055	17.8396	0.839633	0.558786	23.1682	22.5913	22.8798	5.87977	0.0169829	303.925			14	171.55	49.6285	137.457	7.85508
	A07		16.2077	17.183	17.3213	17.7615	16.904	19.4933	18.1986	1.19863	0.435688	22.4951	25.3863	23.9407	6.94066	0.00814051	186.843			18	174.13	25.0584	241.728	41.2943
	B01	ZouTai	15.6296	16.5081	16.0785	17.0254	16.0721	18.5304	17.3012	0.301229	0.811561	22.3178	22.7055	22.5116	5.51162	0.0219198	270.094	138.008	42.4072	22	142.286	33.1702	166.328	41.2943
	B02		15.2468	16.1346	16.6931	16.902	16.0248	18.2436	17.1342	0.13422	0.911162	22.8376	22.6087	22.7231	5.72312	0.0189308	207.765			2	220.029	27.4323	304.307	30.9827
	B03		12.7732	13.9298	14.1455	14.2972	13.6162	18.38	15.9981	-1.00194	2.00269	24.0174	23.0568	23.5371	6.5371	0.0107681	53.7678			6	367.506	59.9502	297.028	34.7835
	B04		12.3262	13.2785	13.6178	13.7043	13.0742	18.0545	15.5643	-1.43566	2.70507	22.788	22.5599	22.674	5.67397	0.0195869	72.4083			10	272.098	38.1209	138.008	42.4072
	B05		13.7698	14.8257	15.2016	14.6781	14.599	18.2787	16.4389	-0.561109	1.4754	23.6316	22.9689	23.3003	6.30029	0.0126889	86.003			14	171.55	49.6285	137.457	7.85508
	B06	14-Cont	14.2094	13.3965	13.7906	13.9588	13.7988	18.4799	16.1394	-0.860642	1.81585	23.934	23.5809	23.7575	6.75747	0.00924271	50.9003	171.55	49.6285	18	174.13	25.0584	241.728	41.2943
	B07		14.2658	16.7906	17.2349	17.107	16.0971	18.2657	17.1814	0.181417	0.881837	22.2739	22.4175	22.3457	5.34569	0.0245916	278.868			22	142.286	33.1702	166.328	37.2814
	B08		16.0132	16.4662	16.8532	16.879	16.4442	17.9658	17.205	0.204975	0.867554	22.1424	22.6155	22.3789	5.37895	0.0240312	277			2	220.029	27.4323	304.307	30.9827
	B09		11.0372	13.4881	14.176	14.2268	12.9004	20.9457	16.9231	-0.0769485	1.05478	22.3711	26.2113	24.2912	7.29116	0.00638471	60.5309			6	367.506	0.0532568	297.028	34.7835
	B10		14.7872	15.4712	16.5901	16.5167	15.6162	18.6286	17.1224	0.122378	0.918672	22.3159	23.3578	22.8368	5.83683	0.017496	190.449
	C04	ZouTai	12.9567	15.063	16.2706	16.3859	14.7634	18.0065	16.385	-0.615045	1.53161	22.607	22.6898	22.6484	5.64841	0.019937	130.17	137.457	7.85508
	C05		14.7627	15.808	16.126	16.0854	15.5656	18.1815	16.8736	-0.126449	1.0916	22.8683	23.1655	23.0169	6.01689	0.0154432	141.472
	C06		15.4441	15.3868	16.4195	16.8791	15.7501	18.1924	16.9713	-0.028741	1.02012	22.7185	23.3044	23.0115	6.01148	0.0155011	151.954
	C07		13.334	14.3756	15.444	15.7184	14.3845	17.0466	15.7156	-1.28445	2.43589	22.2576	22.1718	22.2147	5.21475	0.0269281	110.547
	C08		13.7312	16.0038	16.708	17.0031	15.481	18.093	16.787	-0.212999	1.15909	22.6035	23.0285	22.816	5.81601	0.0177504	153.14
	C09	18-Cont	17.4639	16.9006	17.5327	18.0138	17.2991	18.394	17.8466	0.846575	0.556103	23.5534	23.079	23.3162	6.31621	0.0125497	225.672	174.13	25.0584
	C10		15.5601	16.0874	16.4826	16.6143	16.0434	18.2781	17.1608	0.160763	0.894552	22.5222	22.5448	22.5335	5.53348	0.0215901	241.351
	C11		13.2845	15.4042	15.9402	16.1347	14.8763	18.1826	16.5294	-0.470556	1.38564	22.7619	22.2618	22.5119	5.51187	0.021916	158.165
	C12		12.8095	14.2913	15.0343	14.996	14.0451	18.4337	16.2394	-0.760645	1.69425	22.3331	22.8643	22.5987	5.5987	0.0206359	121.8
	D01		14.0892	14.0536	14.2473	14.7061	14.1301	18.113	16.1215	-0.878486	1.83845	22.3793	22.5386	22.459	5.45895	0.0227348	123.663
	D07	ZouTai	16.1091	16.1609	16.3113	16.4913	16.1938	18.0227	17.1082	0.108217	0.927734	23.9599	22.9154	23.4377	6.43766	0.0115364	124.35	241.728	41.2943
	D08		15.1864	16.6533	17.9518	17.6871	16.5971	18.079	17.3381	0.338085	0.791091	23.308	22.8916	23.0998	6.09977	0.0145809	184.314
	D09		16.7567	16.6324	17.4171	17.0645	16.9354	18.2355	17.5854	0.585443	0.666445	22.6852	22.2838	22.4845	5.48451	0.0223357	335.146
	D10		17.3155	17.4774	18.1338	17.9375	17.6422	18.0713	17.8568	0.856777	0.552185	22.6567	22.8608	22.7588	5.75877	0.0184688	334.468
	D11		16.3585	16.2509	16.693	16.8008	16.4341	18.169	17.3016	0.301553	0.811379	22.8303	22.6527	22.7415	5.7415	0.0186912	230.364
	D12	22-Cont	17.0196	17.7575	18.0194	18.0924	17.5988	19.1728	18.3858	1.38584	0.382668	23.6122	24.0714	23.8418	6.8418	0.00871793	227.82	142.286	33.1702
	E01		14.9267	16.5472	17.0029	17.146	16.1589	18.6021	17.3805	0.380509	0.768167	23.5315	23.4164	23.4739	6.47394	0.01125	146.452
	E02		15.8259	17.0785	17.5054	17.4467	16.8033	18.2727	17.538	0.537964	0.688742	28.3418	23.6752	26.0085	9.00849	0.00194166	28.1914
	E03		16.6502	17.1178	17.7631	17.8375	17.177	19.1485	18.1628	1.16276	0.446658	23.6288	24.24	23.9344	6.9344	0.00817593	183.047
	E04		15.4359	16.7402	17.0344	17.2666	16.4035	19.596	17.9997	0.99975	0.500087	23.4231	25.1991	24.3111	7.3111	0.00629708	125.92
	E10	ZouTai	12.6556	14.3627	15.7169	15.8452	14.2451	19.3147	16.7799	-0.220083	1.1648	23.3316	23.9432	23.6374	6.63739	0.0100449	86.237	166.328	37.2814
	E11		14.4286	15.0018	16.1764	16.1568	15.2023	18.7472	16.9747	-0.0252688	1.01767	22.4111	23.0989	22.755	5.75499	0.0185172	181.957
	E12		15.8576	15.8369	16.5247	16.5111	16.0731	18.8085	17.4408	0.440772	0.73674	24.7741	22.9287	23.8514	6.85138	0.00866024	117.548
	F01		14.9357	15.4776	15.7809	16.2277	15.3981	18.718	17.058	0.0580346	0.960572	23.2628	23.1034	23.1831	6.1831	0.0137626	143.275
	F02		15.9243	16.8689	17.3043	17.6481	16.6992	18.6397	17.6694	0.669433	0.628754	22.968	22.4635	22.7158	5.71578	0.0190274	302.621
	F03	2-Cont	14.2471	15.5425	15.7326	15.6721	15.1741	18.9792	17.0766	0.0766244	0.948274	23.7946	22.3853	23.09	6.08999	0.0146802	154.809	220.029	27.4323
	F04		14.8582	16.6368	17.0716	17.1317	16.1889	18.9693	17.5791	0.579102	0.66938	24.3198	22.5915	23.4557	6.45569	0.0113931	170.204
	F05		15.8783	17.177	17.765	17.7285	16.9401	18.7538	17.8469	0.846941	0.555962	23.4056	22.4838	22.9447	5.94469	0.0162356	292.028
	F06		14.319	16.8029	17.4808	17.5704	16.2009	18.9439	17.5724	0.572428	0.672484	24.0649	22.2689	23.1669	6.16689	0.0139181	206.966
	F07		15.3957	16.6191	17.7047	17.4418	16.5731	22.3279	19.4505	2.45053	0.182943	23.2402	26.0178	24.629	7.629	0.00505175	276.138
	G01	ZouTai	16.1861	16.0476	16.3173	16.3906	16.1837	19.2169	17.7003	0.700276	0.615455	24.141	22.4772	23.3091	6.3091	0.0126117	204.916	304.307	30.9827
	G02		16.1379	16.3495	17.7525	17.6104	16.7466	19.0438	17.8952	0.895215	0.537667	23.0886	22.5134	22.801	5.80099	0.0179361	333.591
	G03		17.0441	17.3085	18.0814	17.7819	17	18.8818	17.9409	0.940895	0.52091	23.0663	22.1646	22.6154	5.61543	0.0203979	391.583
	G04		15.8892	15.6996	15.9965	15.9629	15.8618	18.8522	17.357	0.356963	0.780807	23.0269	22.0657	22.5463	5.54629	0.0213993	274.067
	G05		16.0988	16.8704	16.4031	17.4244	16.4574	18.1537	17.3056	0.305585	0.809114	23.1204	21.4461	22.2832	5.28324	0.0256795	317.378
	G06	6-Cont	16.9715	17.0314	17.7493	18.079	17.2507	17.7897	17.5202	0.520229	0.697261	22.8348	22.0017	22.4183	5.41827	0.0233851	335.385	367.506	59.9502
	G07		17.6358	17.446	18.2819	18.5095	17.7879	17.6814	17.7347	0.734654	0.600962	22.4148	21.4726	21.9437	4.94371	0.0324933	540.688
	G08		15.7227	15.9015	16.2605	16.4878	15.9616	18.3742	17.1679	0.167867	0.890158	23.5306	22.4634	22.997	5.99696	0.015658	175.901
	G09		17.3482	17.1227	17.6848	18.0766	17.3853	17.8403	17.6128	0.612784	0.653934	22.6385	21.625	22.1318	5.13175	0.0285226	436.169
	G10		17.1359	17.0976	17.5599	17.6472	17.2645	18.0754	17.67	0.669956	0.628526	22.9878	22.0302	22.509	5.50898	0.02196	349.388
	H04	ZouTai	16.9251	16.7098	17.1395	17.3855	16.9248	17.2511	17.0879	0.0879332	0.94087	23.276	21.7228	22.4994	5.4994	0.0221063	234.956	297.028	34.7835
	H05		16.318	17.564	17.6472	18.1498	17.1764	17.7277	17.4521	0.452053	0.731002	22.8685	21.9972	22.4328	5.43283	0.0231503	316.692
	H06		15.7474	15.6495	15.6495	16.0418	15.6821	17.9128	16.7975	-0.202517	1.1507	23.0076	21.9108	22.4592	5.45919	0.022731	197.54
	H07		16.4557	16.6841	16.7539	16.8409	16.6313	18.9804	17.8058	0.80584	0.572029	22.5121	22.5343	22.5232	5.52321	0.0217444	380.128
	H08		16.94	16.6009	17.0673	17.7514	16.8694	18.8724	17.8709	0.870892	0.546809	22.8832	22.4839	22.6836	5.68358	0.0194569	355.826
													22.9135

## Sheet: Run Information
File Name	Arnt1-Liver_2014-11-09 21-21-21_BR003621.pcrd
Created By User	admin
Notes
ID
Run Started	11/09/2014 13:21:52 UTC
Run Ended	11/09/2014 14:27:50 UTC
Sample Vol	25
Lid Temp	105
Protocol File Name	百乐程序.prcl
Plate Setup File Name	Quick Plate_90-wells_SYBR Only.pltd
Base Serial Number	BR003621
Optical Head Serial Number	788BR03772
CFX Manager Version	3.1.1517.0823.
