# Supplementary material for: The Tibetan medicine Zuotai influences clock gene expression in the liver of mice
Source: PeerJ. 2016 Jan 26;4:e1632. doi: 10.7717/peerj.1632 (PMC4741069; doi:10.7717/peerj.1632)
Supplement: Supplemental Information 3 — Nr1d2 raw data. [file peerj-04-1632-s003.xlsx]

## Sheet: 0
			Liv-B-actin					B-actin				Liv-nr1d2 09 15	Nr1d2?
		Group					average	2015-09-17	average	dCt	2^(-dCt)		per3	average	dCt	2^(-dCt)	%B-actinx100	Mean	SEM
	A03	10-Cont	18.2357	18.8895	19.0141	19.3075	18.7131	19.4741	19.4741	2.47411	0.179977	25.7574	25.7574	25.7574	8.75744	0.00231072	128.39	78.6721	14.0895		Cont		佐太
	A04		17.7402	17.9786	18.1217	18.377	17.9469	18.3362	18.3362	1.33624	0.396052	26.0243	26.0243	26.0243	9.02432	0.00192047	48.4904			6	68.3999	3.88244	75.8042	19.0649			10.209
	A05		17.3937	18.21	18.3044	18.8204	17.9693	18.5086	18.5086	1.50859	0.351455	26.0439	26.0439	26.0439	9.04389	0.00189461	53.9075			10	78.6721	14.0895	158.074	26.9767			8.24644
	A06		18.1557	17.8527	18.513	19.0181	18.1738	17.5055	17.5055	0.505456	0.704438	24.4088	24.4088	24.4088	7.40877	0.0058849	83.5404			14	470.658	40.5214	345.254	24.153
	A07		16.2077	17.183	17.3213	17.7615	16.904	19.4933	19.4933	2.49327	0.177603	26.4766	26.4766	26.4766	9.47661	0.00140364	79.0325			18	698.293	67.5963	625.115	37.6574
	B01	ZouTai	15.6296	16.5081	16.0785	17.0254	16.0721	18.5304	18.5304	1.53039	0.346184	23.8078	23.8078	23.8078	6.80778	0.00892596	257.839	158.074	26.9767	22	513.828	62.58	480.156	37.6574
	B02		15.2468	16.1346	16.6931	16.902	16.0248	18.2436	18.2436	1.24361	0.422316	24.821	24.821	24.821	7.821	0.00442227	104.715			2	383.477	48.0584	236.055	22.0567
	B03		12.7732	13.9298	14.1455	14.2972	13.6162	18.38	18.38	1.37996	0.384229	24.4938	24.4938	24.4938	7.49384	0.0055479	144.39			6	68.3999	3.88244	75.8042	19.0649
	B04		12.3262	13.2785	13.6178	13.7043	13.0742	18.0545	18.0545	1.0545	0.481464	23.9641	23.9641	23.9641	6.96414	0.00800913	166.349			10	78.6721	14.0895	158.074	26.9767
	B05		13.7698	14.8257	15.2016	14.6781	14.599	18.2787	18.2787	1.27874	0.412154	24.6951	24.6951	24.6951	7.69515	0.00482536	117.077			14	470.658	40.5214	345.254	24.153
	B06	14-Cont	14.2094	13.3965	13.7906	13.9588	13.7988	18.4799	18.4799	1.47987	0.358522	22.5881	22.5881	22.5881	5.58806	0.0207887	579.843	470.658	40.5214	18	698.293	67.5963	625.115	37.6574
	B07		14.2658	16.7906	17.2349	17.107	16.0971	18.2657	18.2657	1.26572	0.415892	22.7342	22.7342	22.7342	5.73416	0.0187865	451.716			22	513.828	62.58	480.156	26.2039
	B08		16.0132	16.4662	16.8532	16.879	16.4442	17.9658	17.9658	0.965752	0.512011	22.1478	22.1478	22.1478	5.14785	0.0282061	550.888			2	383.477	48.0584	236.055	22.0567
	B09		11.0372	13.4881	14.176	14.2268	12.9004	20.9457	20.9457	3.94568	0.0648979	25.6471	25.6471	25.6471	8.64712	0.00249435	384.349			6	68.3999	0.0532568	75.8042	19.0649
	B10		14.7872	15.4712	16.5901	16.5167	15.6162	18.6286	18.6286	1.6286	0.323402	23.322	23.322	23.322	6.32202	0.0124992	386.492
	C04	ZouTai	12.9567	15.063	16.2706	16.3859	14.7634	18.0065	18.0065	1.00647	0.497761	23.1355	23.1355	23.1355	6.13552	0.0142241	285.76	345.254	24.153
	C05		14.7627	15.808	16.126	16.0854	15.5656	18.1815	18.1815	1.18154	0.44088	22.7582	22.7582	22.7582	5.75817	0.0184764	419.08
	C06		15.4441	15.3868	16.4195	16.8791	15.7501	18.1924	18.1924	1.19239	0.437576	23.1067	23.1067	23.1067	6.10669	0.0145112	331.628
	C07		13.334	14.3756	15.444	15.7184	14.3845	17.0466	17.0466	0.0465771	0.968231	22.0648	22.0648	22.0648	5.06476	0.0298783	308.587
	C08		13.7312	16.0038	16.708	17.0031	15.481	18.093	18.093	1.09297	0.468794	22.8062	22.8062	22.8062	5.80622	0.0178712	381.217
	C09	18-Cont	17.4639	16.9006	17.5327	18.0138	17.2991	18.394	18.394	1.39405	0.380496	22.0272	22.0272	22.0272	5.02724	0.0306656	805.936	698.293	67.5963
	C10		15.5601	16.0874	16.4826	16.6143	16.0434	18.2781	18.2781	1.27815	0.412324	21.8161	21.8161	21.8161	4.81606	0.0354995	860.96
	C11		13.2845	15.4042	15.9402	16.1347	14.8763	18.1826	18.1826	1.18262	0.440551	22.2691	22.2691	22.2691	5.26905	0.0259332	588.655
	C12		12.8095	14.2913	15.0343	14.996	14.0451	18.4337	18.4337	1.43365	0.370192	22.766	22.766	22.766	5.766	0.0183764	496.402
	D01		14.0892	14.0536	14.2473	14.7061	14.1301	18.113	18.113	1.11297	0.462341	21.8703	21.8703	21.8703	4.87025	0.0341907	739.514
	D07	ZouTai	16.1091	16.1609	16.3113	16.4913	16.1938	18.0227	18.0227	1.02268	0.492203	22.2741	22.2741	22.2741	5.27408	0.025843	525.048	625.115	37.6574
	D08		15.1864	16.6533	17.9518	17.6871	16.5971	18.079	18.079	1.07903	0.473349	22.0153	22.0153	22.0153	5.01532	0.0309199	653.217
	D09		16.7567	16.6324	17.4171	17.0645	16.9354	18.2355	18.2355	1.23549	0.424698	22.4194	22.4194	22.4194	5.41943	0.0233662	550.184
	D10		17.3155	17.4774	18.1338	17.9375	17.6422	18.0713	18.0713	1.07131	0.475887	21.8551	21.8551	21.8551	4.85513	0.0345509	726.032
	D11		16.3585	16.2509	16.693	16.8008	16.4341	18.169	18.169	1.16897	0.444738	22.0663	22.0663	22.0663	5.06631	0.0298461	671.094
	D12	22-Cont	17.0196	17.7575	18.0194	18.0924	17.5988	19.1728	19.1728	2.17283	0.221776	22.9276	22.9276	22.9276	5.92759	0.0164293	740.806	513.828	62.58
	E01		14.9267	16.5472	17.0029	17.146	16.1589	18.6021	18.6021	1.60208	0.329402	22.8054	22.8054	22.8054	5.80536	0.0178819	542.86
	E02		15.8259	17.0785	17.5054	17.4467	16.8033	18.2727	18.2727	1.27265	0.413899	23.0281	23.0281	23.0281	6.02815	0.0153231	370.215
	E03		16.6502	17.1178	17.7631	17.8375	17.177	19.1485	19.1485	2.1485	0.225547	23.5959	23.5959	23.5959	6.59588	0.0103381	458.358
	E04		15.4359	16.7402	17.0344	17.2666	16.4035	19.596	19.596	2.59599	0.165398	24.048	24.048	24.048	7.04796	0.00755705	456.902
	E10	ZouTai	12.6556	14.3627	15.7169	15.8452	14.2451	19.3147	19.3147	2.31475	0.200998	23.6365	23.6365	23.6365	6.63654	0.0100508	500.046	480.156	26.2039
	E11		14.4286	15.0018	16.1764	16.1568	15.2023	18.7472	18.7472	1.74721	0.297878	23.0109	23.0109	23.0109	6.01092	0.0155072	520.588
	E12		15.8576	15.8369	16.5247	16.5111	16.0731	18.8085	18.8085	1.80847	0.285494	23.0748	23.0748	23.0748	6.07482	0.0148353	519.636
	F01		14.9357	15.4776	15.7809	16.2277	15.3981	18.718	18.718	1.718	0.30397	23.4412	23.4412	23.4412	6.44116	0.0115085	378.606
	F02		15.9243	16.8689	17.3043	17.6481	16.6992	18.6397	18.6397	1.63971	0.320922	23.0148	23.0148	23.0148	6.01481	0.0154654	481.906
	F03	2-Cont	14.2471	15.5425	15.7326	15.6721	15.1741	18.9792	18.9792	1.9792	0.253631	23.1447	23.1447	23.1447	6.14472	0.0141337	557.254	383.477	48.0584
	F04		14.8582	16.6368	17.0716	17.1317	16.1889	18.9693	18.9693	1.96932	0.255373	23.6744	23.6744	23.6744	6.67441	0.00979045	383.379
	F05		15.8783	17.177	17.765	17.7285	16.9401	18.7538	18.7538	1.75378	0.296524	23.4571	23.4571	23.4571	6.45714	0.0113817	383.837
	F06		14.319	16.8029	17.4808	17.5704	16.2009	18.9439	18.9439	1.94392	0.259909	24.1561	24.1561	24.1561	7.15613	0.00701119	269.756
	F07		15.3957	16.6191	17.7047	17.4418	16.5731	22.3279	22.3279	5.32792	0.0248964	27.2795	27.2795	27.2795	10.2795	0.000804547	323.158
	G01	ZouTai	16.1861	16.0476	16.3173	16.3906	16.1837	19.2169	19.2169	2.21689	0.215105	24.7449	24.7449	24.7449	7.74486	0.00466193	216.728	236.055	22.0567
	G02		16.1379	16.3495	17.7525	17.6104	16.7466	19.0438	19.0438	2.04382	0.24252	24.7364	24.7364	24.7364	7.73644	0.0046892	193.353
	G03		17.0441	17.3085	18.0814	17.7819	17	18.8818	18.8818	1.88179	0.271347	23.8397	23.8397	23.8397	6.83973	0.00873043	321.744
	G04		15.8892	15.6996	15.9965	15.9629	15.8618	18.8522	18.8522	1.85217	0.276976	24.3571	24.3571	24.3571	7.35708	0.00609958	220.221
	G05		16.0988	16.8704	16.4031	17.4244	16.4574	18.1537	18.1537	1.15373	0.44946	23.6071	23.6071	23.6071	6.60711	0.010258	228.229
	G06	6-Cont	16.9715	17.0314	17.7493	18.079	17.2507	17.7897	17.7897	0.789733	0.578451	25.2051	25.2051	25.2051	8.20514	0.00338849	58.5786	68.3999	3.88244
	G07		17.6358	17.446	18.2819	18.5095	17.7879	17.6814	17.6814	0.68138	0.623568	24.9308	24.9308	24.9308	7.9308	0.00409819	65.7215
	G08		15.7227	15.9015	16.2605	16.4878	15.9616	18.3742	18.3742	1.37418	0.385771	25.3461	25.3461	25.3461	8.34611	0.00307306	79.6603
	G09		17.3482	17.1227	17.6848	18.0766	17.3853	17.8403	17.8403	0.84031	0.558524	25.1522	25.1522	25.1522	8.15223	0.00351508	62.9351
	G10		17.1359	17.0976	17.5599	17.6472	17.2645	18.0754	18.0754	1.07545	0.474523	25.1323	25.1323	25.1323	8.13234	0.00356386	75.104
	H04	ZouTai	16.9251	16.7098	17.1395	17.3855	16.9248	17.2511	17.2511	0.251069	0.840273	25.2106	25.2106	25.2106	8.21063	0.00337562	40.1729	75.8042	19.0649
	H05		16.318	17.564	17.6472	18.1498	17.1764	17.7277	17.7277	0.727701	0.603865	25.6468	25.6468	25.6468	8.64682	0.00249488	41.3151
	H06		15.7474	15.6495	15.6495	16.0418	15.6821	17.9128	17.9128	0.912833	0.531141	25.4819	25.4819	25.4819	8.48195	0.00279691	52.6586
	H07		16.4557	16.6841	16.7539	16.8409	16.6313	18.9804	18.9804	1.98042	0.253417	25.2991	25.2991	25.2991	8.29906	0.00317492	125.284
	H08		16.94	16.6009	17.0673	17.7514	16.8694	18.8724	18.8724	1.87235	0.273127	25.2581	25.2581	25.2581	8.25811	0.00326633	119.59

## Sheet: Run Information
File Name	Arnt1-Liver_2014-11-09 21-21-21_BR003621.pcrd
Created By User	admin
Notes
ID
Run Started	11/09/2014 13:21:52 UTC
Run Ended	11/09/2014 14:27:50 UTC
Sample Vol	25
Lid Temp	105
Protocol File Name	百乐程序.prcl
Plate Setup File Name	Quick Plate_90-wells_SYBR Only.pltd
Base Serial Number	BR003621
Optical Head Serial Number	788BR03772
CFX Manager Version	3.1.1517.0823.
