# Supplementary material for: The Tibetan medicine Zuotai influences clock gene expression in the liver of mice
Source: PeerJ. 2016 Jan 26;4:e1632. doi: 10.7717/peerj.1632 (PMC4741069; doi:10.7717/peerj.1632)
Supplement: Supplemental Information 4 — Per3 raw data. [file peerj-04-1632-s004.xlsx]

## Sheet: 0
			Liv-B-actin					B-actin				Liv-per3 09 15	Per3
		Group					average	2015-09-17	average	dCt	2^(-dCt)		per3	average	dCt	2^(-dCt)	%B-actinx100	Mean	SEM
	A03	10-Cont	18.2357	18.8895	19.0141	19.3075	18.7131	19.4741	19.4741	2.47411	0.179977	29.1676	29.1676	29.1676	12.1676	0.000217361	12.0772	7.59058	1.49986		Cont-39		佐太-35
	A04		17.7402	17.9786	18.1217	18.377	17.9469	18.3362	18.3362	1.33624	0.396052	28.2508	28.2508	28.2508	11.2508	0.000410355	10.3611			6	21.7218	2.35998	20.4216	2.84802			38.8953
	A05		17.3937	18.21	18.3044	18.8204	17.9693	18.5086	18.5086	1.50859	0.351455	29.332	29.332	29.332	12.332	0.000193956	5.51865			10	7.59058	1.49986	9.8361	2.67575			34.6999
	A06		18.1557	17.8527	18.513	19.0181	18.1738	17.5055	17.5055	0.505456	0.704438	28.4489	28.4489	28.4489	11.4489	0.000357719	5.07807			14	87.3105	13.8445	58.8998	15.2937
	A07		16.2077	17.183	17.3213	17.7615	16.904	19.4933	19.4933	2.49327	0.177603	30.4829	30.4829	30.4829	13.4829	8.7343e-05	4.91787			18	295.238	14.4232	341.311	36.3011
	B01	ZouTai	15.6296	16.5081	16.0785	17.0254	16.0721	18.5304	18.5304	1.53039	0.346184	27.4781	27.4781	27.4781	10.4781	0.000701119	20.2528	9.8361	2.67575	22	191.853	17.8622	146.714	36.3011
	B02		15.2468	16.1346	16.6931	16.902	16.0248	18.2436	18.2436	1.24361	0.422316	28.3555	28.3555	28.3555	11.3555	0.000381649	9.03706			2	174.13	17.1681	97.7104	11.2813
	B03		12.7732	13.9298	14.1455	14.2972	13.6162	18.38	18.38	1.37996	0.384229	28.9928	28.9928	28.9928	11.9928	0.000245357	6.3857			6	21.7218	2.35998	20.4216	2.84802
	B04		12.3262	13.2785	13.6178	13.7043	13.0742	18.0545	18.0545	1.0545	0.481464	28.2856	28.2856	28.2856	11.2856	0.000400575	8.31993			10	7.59058	1.49986	9.8361	2.67575
	B05		13.7698	14.8257	15.2016	14.6781	14.599	18.2787	18.2787	1.27874	0.412154	29.1921	29.1921	29.1921	12.1921	0.000213701	5.18499			14	87.3105	13.8445	58.8998	15.2937
	B06	14-Cont	14.2094	13.3965	13.7906	13.9588	13.7988	18.4799	18.4799	1.47987	0.358522	25.1439	25.1439	25.1439	8.14394	0.00353533	98.6084	87.3105	13.8445	18	295.238	14.4232	341.311	36.3011
	B07		14.2658	16.7906	17.2349	17.107	16.0971	18.2657	18.2657	1.26572	0.415892	25.5075	25.5075	25.5075	8.50751	0.00274779	66.0698			22	191.853	17.8622	146.714	16.7957
	B08		16.0132	16.4662	16.8532	16.879	16.4442	17.9658	17.9658	0.965752	0.512011	25.0659	25.0659	25.0659	8.06588	0.00373189	72.8868			2	174.13	17.1681	97.7104	11.2813
	B09		11.0372	13.4881	14.176	14.2268	12.9004	20.9457	20.9457	3.94568	0.0648979	27.1365	27.1365	27.1365	10.1365	0.000888415	136.894			6	21.7218	0.0532568	20.4216	2.84802
	B10		14.7872	15.4712	16.5901	16.5167	15.6162	18.6286	18.6286	1.6286	0.323402	25.96	25.96	25.96	8.95995	0.0020081	62.0931
	C04	ZouTai	12.9567	15.063	16.2706	16.3859	14.7634	18.0065	18.0065	1.00647	0.497761	26.6816	26.6816	26.6816	9.68164	0.00121768	24.4632	58.8998	15.2937
	C05		14.7627	15.808	16.126	16.0854	15.5656	18.1815	18.1815	1.18154	0.44088	24.6239	24.6239	24.6239	7.62388	0.00506972	114.991
	C06		15.4441	15.3868	16.4195	16.8791	15.7501	18.1924	18.1924	1.19239	0.437576	26.1086	26.1086	26.1086	9.10863	0.00181147	41.3978
	C07		13.334	14.3756	15.444	15.7184	14.3845	17.0466	17.0466	0.0465771	0.968231	24.3454	24.3454	24.3454	7.34539	0.00614919	63.5096
	C08		13.7312	16.0038	16.708	17.0031	15.481	18.093	18.093	1.09297	0.468794	25.7329	25.7329	25.7329	8.73286	0.00235043	50.1378
	C09	18-Cont	17.4639	16.9006	17.5327	18.0138	17.2991	18.394	18.394	1.39405	0.380496	23.5123	23.5123	23.5123	6.5123	0.0109548	287.907	295.238	14.4232
	C10		15.5601	16.0874	16.4826	16.6143	16.0434	18.2781	18.2781	1.27815	0.412324	23.3205	23.3205	23.3205	6.32046	0.0125127	303.468
	C11		13.2845	15.4042	15.9402	16.1347	14.8763	18.1826	18.1826	1.18262	0.440551	23.0418	23.0418	23.0418	6.04179	0.0151789	344.542
	C12		12.8095	14.2913	15.0343	14.996	14.0451	18.4337	18.4337	1.43365	0.370192	23.7214	23.7214	23.7214	6.72139	0.00947675	255.995
	D01		14.0892	14.0536	14.2473	14.7061	14.1301	18.113	18.113	1.11297	0.462341	23.2495	23.2495	23.2495	6.24954	0.0131432	284.275
	D07	ZouTai	16.1091	16.1609	16.3113	16.4913	16.1938	18.0227	18.0227	1.02268	0.492203	23.1967	23.1967	23.1967	6.19667	0.0136338	276.995	341.311	36.3011
	D08		15.1864	16.6533	17.9518	17.6871	16.5971	18.079	18.079	1.07903	0.473349	23.0923	23.0923	23.0923	6.09234	0.0146562	309.629
	D09		16.7567	16.6324	17.4171	17.0645	16.9354	18.2355	18.2355	1.23549	0.424698	22.6865	22.6865	22.6865	5.68651	0.0194174	457.204
	D10		17.3155	17.4774	18.1338	17.9375	17.6422	18.0713	18.0713	1.07131	0.475887	23.2905	23.2905	23.2905	6.29049	0.0127754	268.454
	D11		16.3585	16.2509	16.693	16.8008	16.4341	18.169	18.169	1.16897	0.444738	22.8336	22.8336	22.8336	5.83363	0.0175349	394.275
	D12	22-Cont	17.0196	17.7575	18.0194	18.0924	17.5988	19.1728	19.1728	2.17283	0.221776	24.6944	24.6944	24.6944	7.69444	0.00482772	217.685	191.853	17.8622
	E01		14.9267	16.5472	17.0029	17.146	16.1589	18.6021	18.6021	1.60208	0.329402	24.3057	24.3057	24.3057	7.30573	0.00632058	191.881
	E02		15.8259	17.0785	17.5054	17.4467	16.8033	18.2727	18.2727	1.27265	0.413899	24.4489	24.4489	24.4489	7.44892	0.00572337	138.28
	E03		16.6502	17.1178	17.7631	17.8375	17.177	19.1485	19.1485	2.1485	0.225547	24.5213	24.5213	24.5213	7.52127	0.00544342	241.343
	E04		15.4359	16.7402	17.0344	17.2666	16.4035	19.596	19.596	2.59599	0.165398	25.4737	25.4737	25.4737	8.47367	0.002813	170.075
	E10	ZouTai	12.6556	14.3627	15.7169	15.8452	14.2451	19.3147	19.3147	2.31475	0.200998	25.0719	25.0719	25.0719	8.07195	0.00371622	184.889	146.714	16.7957
	E11		14.4286	15.0018	16.1764	16.1568	15.2023	18.7472	18.7472	1.74721	0.297878	24.7621	24.7621	24.7621	7.76206	0.00460667	154.65
	E12		15.8576	15.8369	16.5247	16.5111	16.0731	18.8085	18.8085	1.80847	0.285494	24.7782	24.7782	24.7782	7.77824	0.0045553	159.558
	F01		14.9357	15.4776	15.7809	16.2277	15.3981	18.718	18.718	1.718	0.30397	25.6237	25.6237	25.6237	8.62367	0.00253522	83.4037
	F02		15.9243	16.8689	17.3043	17.6481	16.6992	18.6397	18.6397	1.63971	0.320922	24.6884	24.6884	24.6884	7.68837	0.00484808	151.068
	F03	2-Cont	14.2471	15.5425	15.7326	15.6721	15.1741	18.9792	18.9792	1.9792	0.253631	24.3763	24.3763	24.3763	7.37627	0.00601897	237.312	174.13	17.1681
	F04		14.8582	16.6368	17.0716	17.1317	16.1889	18.9693	18.9693	1.96932	0.255373	24.8562	24.8562	24.8562	7.85623	0.00431557	168.991
	F05		15.8783	17.177	17.765	17.7285	16.9401	18.7538	18.7538	1.75378	0.296524	24.7265	24.7265	24.7265	7.72645	0.00472179	159.238
	F06		14.319	16.8029	17.4808	17.5704	16.2009	18.9439	18.9439	1.94392	0.259909	25.1808	25.1808	25.1808	8.18084	0.00344605	132.587
	F07		15.3957	16.6191	17.7047	17.4418	16.5731	22.3279	22.3279	5.32792	0.0248964	28.185	28.185	28.185	11.185	0.000429513	172.52
	G01	ZouTai	16.1861	16.0476	16.3173	16.3906	16.1837	19.2169	19.2169	2.21689	0.215105	26.0248	26.0248	26.0248	9.02479	0.00191986	89.2521	97.7104	11.2813
	G02		16.1379	16.3495	17.7525	17.6104	16.7466	19.0438	19.0438	2.04382	0.24252	25.537	25.537	25.537	8.53702	0.00269217	111.008
	G03		17.0441	17.3085	18.0814	17.7819	17	18.8818	18.8818	1.88179	0.271347	25.1151	25.1151	25.1151	8.11515	0.00360659	132.914
	G04		15.8892	15.6996	15.9965	15.9629	15.8618	18.8522	18.8522	1.85217	0.276976	25.6531	25.6531	25.6531	8.65312	0.00248401	89.6832
	G05		16.0988	16.8704	16.4031	17.4244	16.4574	18.1537	18.1537	1.15373	0.44946	25.4038	25.4038	25.4038	8.40376	0.00295269	65.694
	G06	6-Cont	16.9715	17.0314	17.7493	18.079	17.2507	17.7897	17.7897	0.789733	0.578451	26.8435	26.8435	26.8435	9.84351	0.00108845	18.8166	21.7218	2.35998
	G07		17.6358	17.446	18.2819	18.5095	17.7879	17.6814	17.6814	0.68138	0.623568	26.2671	26.2671	26.2671	9.2671	0.00162302	26.0279
	G08		15.7227	15.9015	16.2605	16.4878	15.9616	18.3742	18.3742	1.37418	0.385771	26.8427	26.8427	26.8427	9.84273	0.00108904	28.2301
	G09		17.3482	17.1227	17.6848	18.0766	17.3853	17.8403	17.8403	0.84031	0.558524	27.1925	27.1925	27.1925	10.1925	0.000854606	15.3012
	G10		17.1359	17.0976	17.5599	17.6472	17.2645	18.0754	18.0754	1.07545	0.474523	27.0245	27.0245	27.0245	10.0245	0.000960104	20.233
	H04	ZouTai	16.9251	16.7098	17.1395	17.3855	16.9248	17.2511	17.2511	0.251069	0.840273	26.9506	26.9506	26.9506	9.95059	0.00101059	12.0269	20.4216	2.84802
	H05		16.318	17.564	17.6472	18.1498	17.1764	17.7277	17.7277	0.727701	0.603865	26.7953	26.7953	26.7953	9.79528	0.00112545	18.6374
	H06		15.7474	15.6495	15.6495	16.0418	15.6821	17.9128	17.9128	0.912833	0.531141	26.7304	26.7304	26.7304	9.73036	0.00117726	22.1647
	H07		16.4557	16.6841	16.7539	16.8409	16.6313	18.9804	18.9804	1.98042	0.253417	27.9797	27.9797	27.9797	10.9797	0.000495212	19.5414
	H08		16.94	16.6009	17.0673	17.7514	16.8694	18.8724	18.8724	1.87235	0.273127	27.2659	27.2659	27.2659	10.2659	0.000812211	29.7374
													25.8259

## Sheet: Run Information
File Name	Arnt1-Liver_2014-11-09 21-21-21_BR003621.pcrd
Created By User	admin
Notes
ID
Run Started	11/09/2014 13:21:52 UTC
Run Ended	11/09/2014 14:27:50 UTC
Sample Vol	25
Lid Temp	105
Protocol File Name	百乐程序.prcl
Plate Setup File Name	Quick Plate_90-wells_SYBR Only.pltd
Base Serial Number	BR003621
Optical Head Serial Number	788BR03772
CFX Manager Version	3.1.1517.0823.
