# Supplementary material for: The Tibetan medicine Zuotai influences clock gene expression in the liver of mice
Source: PeerJ. 2016 Jan 26;4:e1632. doi: 10.7717/peerj.1632 (PMC4741069; doi:10.7717/peerj.1632)
Supplement: Supplemental Information 7 — Cry1 raw data. [file peerj-04-1632-s007.xlsx]

## Sheet: 0
			Liv-B-actin					B-actin					Cry1
		Group					average	2015-09-17	average	dCt	2^(-dCt)	Old	New	average	dCt	2^(-dCt)	%B-actinx100	Mean	SEM
	A03	10-Cont	18.2357	18.8895	19.0141	19.3075	18.7131	19.4741	19.0936	2.0936	0.234295	26.3981	18.0802	22.2391	5.23912	0.0264769	1130.07	1075.17	284.862		Cont-5		佐太-5
	A04		17.7402	17.9786	18.1217	18.377	17.9469	18.3362	18.1415	1.14154	0.453274	23.824	16.9174	20.3707	3.37069	0.0966768	2132.86			6	1192.78	129.918	1003.76	253.062			4.7417
	A05		17.3937	18.21	18.3044	18.8204	17.9693	18.5086	18.239	1.23897	0.423676	25.5947	17.6989	21.6468	4.64679	0.0399188	942.202			10	1075.17	284.862	450.853	136.189			4.71327
	A06		18.1557	17.8527	18.513	19.0181	18.1738	17.5055	17.8396	0.839633	0.558786	26.1677	18.2982	22.233	5.23298	0.0265899	475.852			14	266.053	52.5843	256.629	25.771
	A07		16.2077	17.183	17.3213	17.7615	16.904	19.4933	18.1986	1.19863	0.435688	26	18.0915	22.0458	5.04575	0.0302745	694.866			18	251.551	53.6506	406.199	23.8441
	B01	ZouTai	15.6296	16.5081	16.0785	17.0254	16.0721	18.5304	17.3012	0.301229	0.811561	24.3475	17.1984	20.7729	3.77294	0.0731528	901.384	450.853	136.189	22	764.215	93.0718	528.982	23.8441
	B02		15.2468	16.1346	16.6931	16.902	16.0248	18.2436	17.1342	0.13422	0.911162	24.1215	18.1295	21.1255	4.12552	0.0572922	628.781			2	1002.52	202.79	1209.56	32.9713
	B03		12.7732	13.9298	14.1455	14.2972	13.6162	18.38	15.9981	-1.00194	2.00269	24.412	18.1989	21.3055	4.30545	0.0505743	252.531			6	1192.78	129.918	1003.76	253.062
	B04		12.3262	13.2785	13.6178	13.7043	13.0742	18.0545	15.5643	-1.43566	2.70507	24.4786	18.4358	21.4572	4.45719	0.0455252	168.296			10	1075.17	284.862	450.853	136.189
	B05		13.7698	14.8257	15.2016	14.6781	14.599	18.2787	16.4389	-0.561109	1.4754	24.7819	18.1823	21.4821	4.48212	0.0447452	303.274			14	266.053	52.5843	256.629	25.771
	B06	14-Cont	14.2094	13.3965	13.7906	13.9588	13.7988	18.4799	16.1394	-0.860642	1.81585	26.6316	18.323	22.4773	5.47727	0.022448	123.623	266.053	52.5843	18	251.551	53.6506	406.199	23.8441
	B07		14.2658	16.7906	17.2349	17.107	16.0971	18.2657	17.1814	0.181417	0.881837	25.2565	18.9335	22.095	5.09498	0.029259	331.796			22	764.215	93.0718	528.982	108.362
	B08		16.0132	16.4662	16.8532	16.879	16.4442	17.9658	17.205	0.204975	0.867554	25.5077	18.4466	21.9772	4.97718	0.0317482	365.95			2	1002.52	202.79	1209.56	32.9713
	B09		11.0372	13.4881	14.176	14.2268	12.9004	20.9457	16.9231	-0.0769485	1.05478	27.9308	18.0016	22.9662	5.96618	0.0159956	151.648			6	1192.78	0.0532568	1003.76	253.062
	B10		14.7872	15.4712	16.5901	16.5167	15.6162	18.6286	17.1224	0.122378	0.918672	26.082	17.7766	21.9293	4.9293	0.0328196	357.251
	C04	ZouTai	12.9567	15.063	16.2706	16.3859	14.7634	18.0065	16.385	-0.615045	1.53161	25.5	18.1645	21.8323	4.83227	0.0351027	229.189	256.629	25.771
	C05		14.7627	15.808	16.126	16.0854	15.5656	18.1815	16.8736	-0.126449	1.0916	25.7271	18.1511	21.9391	4.93909	0.0325977	298.622
	C06		15.4441	15.3868	16.4195	16.8791	15.7501	18.1924	16.9713	-0.028741	1.02012	25.6761	18.3752	22.0256	5.02561	0.0307001	300.946
	C07		13.334	14.3756	15.444	15.7184	14.3845	17.0466	15.7156	-1.28445	2.43589	25.2325	18.0058	21.6192	4.61917	0.0406903	167.045
	C08		13.7312	16.0038	16.708	17.0031	15.481	18.093	16.787	-0.212999	1.15909	25.5	18.3162	21.9081	4.90809	0.0333056	287.342
	C09	18-Cont	17.4639	16.9006	17.5327	18.0138	17.2991	18.394	17.8466	0.846575	0.556103	26.429	18.1963	22.3126	5.31263	0.0251616	452.463	251.551	53.6506
	C10		15.5601	16.0874	16.4826	16.6143	16.0434	18.2781	17.1608	0.160763	0.894552	26.204	18.475	22.3395	5.33951	0.0246972	276.085
	C11		13.2845	15.4042	15.9402	16.1347	14.8763	18.1826	16.5294	-0.470556	1.38564	26.3432	18.1254	22.2343	5.23429	0.0265657	191.721
	C12		12.8095	14.2913	15.0343	14.996	14.0451	18.4337	16.2394	-0.760645	1.69425	26.2443	18.0746	22.1594	5.15943	0.0279807	165.151
	D01		14.0892	14.0536	14.2473	14.7061	14.1301	18.113	16.1215	-0.878486	1.83845	25.5721	18.3882	21.9802	4.98016	0.0316826	172.334
	D07	ZouTai	16.1091	16.1609	16.3113	16.4913	16.1938	18.0227	17.1082	0.108217	0.927734	26	17.5614	21.7807	4.78069	0.0363806	392.145	406.199	23.8441
	D08		15.1864	16.6533	17.9518	17.6871	16.5971	18.079	17.3381	0.338085	0.791091	26.2239	18.2255	22.2247	5.22473	0.0267423	338.043
	D09		16.7567	16.6324	17.4171	17.0645	16.9354	18.2355	17.5854	0.585443	0.666445	25.7613	18.3803	22.0708	5.0708	0.0297535	446.45
	D10		17.3155	17.4774	18.1338	17.9375	17.6422	18.0713	17.8568	0.856777	0.552185	26.3009	18.2177	22.2593	5.25928	0.0261094	472.839
	D11		16.3585	16.2509	16.693	16.8008	16.4341	18.169	17.3016	0.301553	0.811379	26	18.0273	22.0137	5.01366	0.0309555	381.517
	D12	22-Cont	17.0196	17.7575	18.0194	18.0924	17.5988	19.1728	18.3858	1.38584	0.382668	25.3478	17.9399	21.6439	4.64386	0.0399999	1045.29	764.215	93.0718
	E01		14.9267	16.5472	17.0029	17.146	16.1589	18.6021	17.3805	0.380509	0.768167	25.1915	18.0869	21.6392	4.63923	0.0401285	522.393
	E02		15.8259	17.0785	17.5054	17.4467	16.8033	18.2727	17.538	0.537964	0.688742	24.3786	18.149	21.2638	4.26381	0.0520554	755.803
	E03		16.6502	17.1178	17.7631	17.8375	17.177	19.1485	18.1628	1.16276	0.446658	25.4121	17.9081	21.6601	4.6601	0.0395522	885.516
	E04		15.4359	16.7402	17.0344	17.2666	16.4035	19.596	17.9997	0.99975	0.500087	26.0529	18.0069	22.0299	5.0299	0.030609	612.073
	E10	ZouTai	12.6556	14.3627	15.7169	15.8452	14.2451	19.3147	16.7799	-0.220083	1.1648	25.3828	18.0579	21.7203	4.72034	0.0379347	325.676	528.982	108.362
	E11		14.4286	15.0018	16.1764	16.1568	15.2023	18.7472	16.9747	-0.0252688	1.01767	25.0234	17.8695	21.4464	4.44641	0.0458667	450.704			Arnt1	Cont		佐太
	E12		15.8576	15.8369	16.5247	16.5111	16.0731	18.8085	17.4408	0.440772	0.73674	27.2379	17.5263	22.3821	5.38214	0.0239781	325.463			6	0.317937	0.0532568	0.189648	0.0455529
	F01		14.9357	15.4776	15.7809	16.2277	15.3981	18.718	17.058	0.0580346	0.960572	24.1413	17.8769	21.0091	4.00911	0.0621067	646.56			10	0.271305	0.112879	0.0458617	0.0191163
	F02		15.9243	16.8689	17.3043	17.6481	16.6992	18.6397	17.6694	0.669433	0.628754	24.371	17.927	21.149	4.14897	0.0563684	896.51			14	0.119395	0.0515106	0.159792	0.0354082
	F03	2-Cont	14.2471	15.5425	15.7326	15.6721	15.1741	18.9792	17.0766	0.0766244	0.948274	25.1188	17.4986	21.3087	4.3087	0.0504607	532.133	1002.52	202.79	18	0.0960096	0.0273366	0.656909	0.10385
	F04		14.8582	16.6368	17.0716	17.1317	16.1889	18.9693	17.5791	0.579102	0.66938	25.2402	17.5295	21.3848	4.38483	0.0478669	715.093			22	0.777727	0.220259	0.477787	0.256307
	F05		15.8783	17.177	17.765	17.7285	16.9401	18.7538	17.8469	0.846941	0.555962	24.4456	17.8898	21.1677	4.16766	0.0556428	1000.84			2	0.51659	0.168262	1.08505	0.367649
	F06		14.319	16.8029	17.4808	17.5704	16.2009	18.9439	17.5724	0.572428	0.672484	24.066	17.622	20.844	3.84399	0.0696378	1035.53			6	0.317937	0.0532568	0.189648	0.0455529
	F07		15.3957	16.6191	17.7047	17.4418	16.5731	22.3279	19.4505	2.45053	0.182943	26.638	17.327	21.9825	4.98252	0.031631	1729.01			10	0.271305	0.112879	0.0458617	0.0191163
	G01	ZouTai	16.1861	16.0476	16.3173	16.3906	16.1837	19.2169	17.7003	0.700276	0.615455	23.8821	17.6029	20.7425	3.7425	0.0747127	1213.94	1209.56	32.9713	14	0.119395	0.0515106	0.159792	0.0354082
	G02		16.1379	16.3495	17.7525	17.6104	16.7466	19.0438	17.8952	0.895215	0.537667	24.351	17.6971	21.0241	4.02406	0.0614663	1143.2			18	0.0960096	0.0273366	0.656909	0.10385
	G03		17.0441	17.3085	18.0814	17.7819	17	18.8818	17.9409	0.940895	0.52091	23.8152	17.9006	20.8579	3.85792	0.0689684	1324			22	0.777727	0.220259	0.477787	0.256307
	G04		15.8892	15.6996	15.9965	15.9629	15.8618	18.8522	17.357	0.356963	0.780807	23.6266	17.3434	20.485	3.48501	0.0893116	1143.84			2	0.51659	0.168262	1.08505	0.367649
	G05		16.0988	16.8704	16.4031	17.4244	16.4574	18.1537	17.3056	0.305585	0.809114	22.9395	17.7351	20.3373	3.3373	0.09894	1222.82			6	0.317937	0.0532568	0.189648	0.0455529
	G06	6-Cont	16.9715	17.0314	17.7493	18.079	17.2507	17.7897	17.5202	0.520229	0.697261	23.8483	17.0717	20.46	3.46001	0.0908724	1303.28	1192.78	129.918
	G07		17.6358	17.446	18.2819	18.5095	17.7879	17.6814	17.7347	0.734654	0.600962	23.4745	17.5699	20.5222	3.52219	0.0870392	1448.33
	G08		15.7227	15.9015	16.2605	16.4878	15.9616	18.3742	17.1679	0.167867	0.890158	24.1244	17.8691	20.9967	3.99674	0.0626415	703.713
	G09		17.3482	17.1227	17.6848	18.0766	17.3853	17.8403	17.6128	0.612784	0.653934	23.4061	17.602	20.504	3.50401	0.088143	1347.89
	G10		17.1359	17.0976	17.5599	17.6472	17.2645	18.0754	17.67	0.669956	0.628526	23.7271	17.8267	20.7769	3.77691	0.0729521	1160.69
	H04	ZouTai	16.9251	16.7098	17.1395	17.3855	16.9248	17.2511	17.0879	0.0879332	0.94087	24.1722	18.0428	21.1075	4.10749	0.0580127	616.586	1003.76	253.062
	H05		16.318	17.564	17.6472	18.1498	17.1764	17.7277	17.4521	0.452053	0.731002	24.3066	18.0182	21.1624	4.16242	0.0558451	763.953
	H06		15.7474	15.6495	15.6495	16.0418	15.6821	17.9128	16.7975	-0.202517	1.1507	24.9109	17.828	21.3694	4.36945	0.0483799	420.437
	H07		16.4557	16.6841	16.7539	16.8409	16.6313	18.9804	17.8058	0.80584	0.572029	23.3611	17.3627	20.3619	3.3619	0.0972671	1700.39
	H08		16.94	16.6009	17.0673	17.7514	16.8694	18.8724	17.8709	0.870892	0.546809	23.542	17.6404	20.5912	3.5912	0.0829738	1517.42

## Sheet: Run Information
File Name	Arnt1-Liver_2014-11-09 21-21-21_BR003621.pcrd
Created By User	admin
Notes
ID
Run Started	11/09/2014 13:21:52 UTC
Run Ended	11/09/2014 14:27:50 UTC
Sample Vol	25
Lid Temp	105
Protocol File Name	百乐程序.prcl
Plate Setup File Name	Quick Plate_90-wells_SYBR Only.pltd
Base Serial Number	BR003621
Optical Head Serial Number	788BR03772
CFX Manager Version	3.1.1517.0823.
