# Supplementary material for: The Tibetan medicine Zuotai influences clock gene expression in the liver of mice
Source: PeerJ. 2016 Jan 26;4:e1632. doi: 10.7717/peerj.1632 (PMC4741069; doi:10.7717/peerj.1632)
Supplement: Supplemental Information 10 — Dbp raw data. [file peerj-04-1632-s010.xlsx]

## Sheet: 0
			Liv-B-actin								Liv-Dbp	Liv-DBP
		Group						average	dCt	2^(-dCt)		2015-01-08		average	dCt	2^(-dCt)	%B-actin	Mean	SEM
	A03	10-Cont	18.2357	18.8895	19.0141	19.3075		18.8617	1.8617	0.275152	30.6044	24.475	30.0999	28.3931	11.3931	0.000371822	0.135133	0.105414	0.0170238		Cont-12		佐太-116
	A04		17.7402	17.9786	18.1217	18.377		18.0544	1.0544	0.481498	28.2544	24.1105	30.1806	27.5152	10.5152	0.000683313	0.141914			6	0.134642	0.0257745	0.0899528	0.0163267			12.2481
	A05		17.3937	18.21	18.3044	18.8204		18.1821	1.18211	0.440706	29.5003	24.0379	30.4445	27.9942	10.9942	0.000490234	0.111238			10	0.105414	0.0170238	0.045066	0.0135291			58.0608
	A06		18.1557	17.8527	18.513	19.0181		18.3849	1.38488	0.382922	30.8467	24.0314	30.5339	28.4707	11.4707	0.00035236	0.0920187			14	0.339434	0.154788	0.199119	0.0516545
	A07		16.2077	17.183	17.3213	17.7615		17.1184	0.11838	0.921221	30.1987	24.3058	30.0376	28.1807	11.1807	0.0004308	0.046764			18	1.29112	0.563882	2.61657	0.577976
	B01	ZouTai	15.6296	16.5081	16.0785	17.0254		16.3104	-0.689611	1.61285	26.8017	23.8262	30.6436	27.0905	10.0905	0.000917173	0.0568667	0.045066	0.0135291	22	0.553768	0.122757	0.285637	0.577976
	B02		15.2468	16.1346	16.6931	16.902		16.2441	-0.755872	1.68865	28.4482	24.2218	31.2145	26.335	9.33498	0.00154843	0.0916962			2	0.124075	0.0271352	0.0965222	0.0162863
	B03		12.7732	13.9298	14.1455	14.2972		13.7864	-3.21359	9.27653	26.5461	24.2351	30.7149	25.3906	8.39059	0.00297975	0.0321213			6	0.134642	0.0257745	0.0899528	0.0163267
	B04		12.3262	13.2785	13.6178	13.7043		13.2317	-3.76829	13.626	28.1497	24.2324	30.3817	26.1911	9.19108	0.00171084	0.0125557			10	0.105414	0.0170238	0.045066	0.0135291
	B05		13.7698	14.8257	15.2016	14.6781		14.6188	-2.38119	5.20965	28.4703	23.9785	30.4427	26.2244	9.2244	0.00167178	0.03209			14	0.339434	0.154788	0.199119	0.0516545
	B06	14-Cont	14.2094	13.3965	13.7906	13.9588		13.8388	-3.16117	8.94552	23.2075	21.9753	27.017	24.0666	7.06662	0.00745996	0.0833932	0.339434	0.154788	18	1.29112	0.563882	2.61657	0.577976
	B07		14.2658	16.7906	17.2349	17.107		16.3496	-0.650416	1.56962	23.7605	22.1231	27.0942	24.3259	7.32595	0.00623261	0.397078			22	0.553768	0.122757	0.285637	0.0859864
	B08		16.0132	16.4662	16.8532	16.879		16.5529	-0.447095	1.36329	22.6269	21.4682	25.945	23.3467	6.34668	0.0122874	0.901304			2	0.124075	0.0271352	0.0965222	0.0162863
	B09		11.0372	13.4881	14.176	14.2268		13.232	-3.76798	13.6231	25.4074	23.0693	26.9002	25.1256	8.12563	0.00358048	0.0262825			6	0.134642	0.0532568	0.0899528	0.0163267
	B10		14.7872	15.4712	16.5901	16.5167		15.8413	-1.15871	2.23257	24.1772	22.1924	26.4567	24.2755	7.27546	0.0064546	0.289111
	C04	ZouTai	12.9567	15.063	16.2706	16.3859		15.1691	-1.83094	3.55768	25.455	23.1245	29.1693	25.9163	8.91627	0.00206983	0.0581792	0.199119	0.0516545
	C05		14.7627	15.808	16.126	16.0854		15.6955	-1.30448	2.46995	23.1958	21.724	26.4999	23.8066	6.80656	0.00893348	0.361686
	C06		15.4441	15.3868	16.4195	16.8791		16.0324	-0.967621	1.95561	25.3149	23.0256	27.7458	25.3621	8.36209	0.0030392	0.155409
	C07		13.334	14.3756	15.444	15.7184		14.718	-2.282	4.86352	23.1606	21.876	27.0537	24.0301	7.03009	0.00765126	0.157319
	C08		13.7312	16.0038	16.708	17.0031		15.8615	-1.13846	2.20146		22.1134	26.7511	24.4323	7.43226	0.00578984	0.263
	C09	18-Cont	17.4639	16.9006	17.5327	18.0138		17.4778	0.477772	0.718086	21.6882	20.4481	25.0554	22.3972	5.39722	0.0237287	3.30444	1.29112	0.563882
	C10		15.5601	16.0874	16.4826	16.6143		16.1861	-0.813903	1.75796	21.2983	20.1892	24.5233	22.0036	5.00361	0.0311719	1.77319
	C11		13.2845	15.4042	15.9402	16.1347		15.1909	-1.80912	3.50428	21.4643	20.5258	25.1553	22.3818	5.38179	0.0239839	0.684416
	C12		12.8095	14.2913	15.0343	14.996		14.2828	-2.7172	6.57597	21.8275	20.5228	24.7143	22.3549	5.3549	0.024435	0.371581
	D01		14.0892	14.0536	14.2473	14.7061		14.2741	-2.72594	6.61591	21.7314	20.8285	25.0988	22.5529	5.55292	0.0213012	0.32197
	D07	ZouTai	16.1091	16.1609	16.3113	16.4913		16.2682	-0.731848	1.66077	20.6378	20.5506	25.7415	22.31	5.30996	0.0252082	1.51787	2.61657	0.577976
	D08		15.1864	16.6533	17.9518	17.6871		16.8696	-0.130379	1.09458	18.809	20.3851	26.1717	21.7886	4.78861	0.0361813	3.30549
	D09		16.7567	16.6324	17.4171	17.0645		16.9677	-0.0323259	1.02266	19.5061	20.0322	25.1237	21.554	4.55401	0.0425702	4.1627
	D10		17.3155	17.4774	18.1338	17.9375		17.7161	0.716059	0.608758		20.2285	25.2643	22.7464	5.74638	0.018628	3.06
	D11		16.3585	16.2509	16.693	16.8008		16.5258	-0.474191	1.38914		20.7448	25.4903	23.1176	6.11755	0.0144023	1.03678
	D12	22-Cont	17.0196	17.7575	18.0194	18.0924		17.7222	0.722235	0.606158		22.1907	27.0844	24.6375	7.63753	0.00502196	0.82849	0.553768	0.122757
	E01		14.9267	16.5472	17.0029	17.146		16.4057	-0.594285	1.50972		22.0155	27.0351	24.5253	7.52529	0.00542828	0.359554
	E02		15.8259	17.0785	17.5054	17.4467		16.9641	-0.0358635	1.02517		21.919	29.984	25.9515	8.95151	0.00201989	0.19703
	E03		16.6502	17.1178	17.7631	17.8375		17.3421	0.342142	0.788869		21.4613	27.129	24.2952	7.29518	0.00636697	0.807101
	E04		15.4359	16.7402	17.0344	17.2666		16.6193	-0.380729	1.302	23.6155	21.7965	26.7599	24.0573	7.05732	0.00750819	0.576666
	E10	ZouTai	12.6556	14.3627	15.7169	15.8452		14.6451	-2.35489	5.11557	24.2632	22.534	27.4427	24.7466	7.74664	0.00465617	0.0910196	0.285637	0.0859864
	E11		14.4286	15.0018	16.1764	16.1568		15.4409	-1.5591	2.94669	24.069	22.1889	27.1167	24.4582	7.4582	0.00568666	0.192984
	E12		15.8576	15.8369	16.5247	16.5111		16.1826	-0.817429	1.76226	23.5671	22.1274	28.0394	24.5779	7.57795	0.00523373	0.296989
	F01		14.9357	15.4776	15.7809	16.2277		15.6055	-1.39452	2.62901	23.5171	22.0925	27.2574	24.289	7.28898	0.00639437	0.243223
	F02		15.9243	16.8689	17.3043	17.6481		16.9364	-0.0636049	1.04507	23.6789	22.0698	27.1745	24.3077	7.30771	0.00631189	0.603966
	F03	2-Cont	14.2471	15.5425	15.7326	15.6721		15.2986	-1.70143	3.25224	25.4757	23.1733	28.6207	25.7566	8.75657	0.00231211	0.0710929	0.124075	0.0271352
	F04		14.8582	16.6368	17.0716	17.1317		16.4246	-0.575406	1.4901	26.353	23.4357	29.4956	26.4281	9.42812	0.00145162	0.0974181
	F05		15.8783	17.177	17.765	17.7285		17.1372	0.137202	0.909281	26.0777	23.2126	29.4245	26.2383	9.23829	0.00165576	0.182096
	F06		14.319	16.8029	17.4808	17.5704		16.5433	-0.456689	1.37239	23.6968	23.4074	29.4818	25.5287	8.52867	0.00270779	0.197305
	F07		15.3957	16.6191	17.7047	17.4418		16.7903	-0.2097	1.15645	28.5549	23.7603	29.3471	27.2208	10.2208	0.000837995	0.0724629
	G01	ZouTai	16.1861	16.0476	16.3173	16.3906		16.2354	-0.764595	1.69889	27.1037	23.489	29.9277	26.8401	9.84014	0.001091	0.0642181	0.0965222	0.0162863
	G02		16.1379	16.3495	17.7525	17.6104		16.9626	-0.037437	1.02629	27.3888	23.4986	29.1354	26.6743	9.67428	0.00122392	0.119257
	G03		17.0441	17.3085	18.0814	17.7819		17	0	1	26.757	23.5397	29.1049	26.4672	9.46719	0.00141284	0.141284
	G04		15.8892	15.6996	15.9965	15.9629		15.887	-1.11295	2.16288	27.1884	23.6825	29.3103	26.7271	9.72706	0.00117995	0.0545544
	G05		16.0988	16.8704	16.4031	17.4244		16.6992	-0.300831	1.23185	26.4803	23.6156	29.7585	26.6181	9.61814	0.00127248	0.103298
	G06	6-Cont	16.9715	17.0314	17.7493	18.079		17.4578	0.457792	0.7281	27.9575	23.6928	29.9715	27.2073	10.2073	0.000845871	0.116175	0.134642	0.0257745
	G07		17.6358	17.446	18.2819	18.5095		17.9683	0.96831	0.511104	27.4603	23.1915	29.8636	26.8384	9.83845	0.00109228	0.213709
	G08		15.7227	15.9015	16.2605	16.4878		16.0931	-0.906878	1.87498	27.4697	23.706	29.6624	26.946	9.94604	0.00101378	0.0540688
	G09		17.3482	17.1227	17.6848	18.0766		17.5581	0.558105	0.679194	27.9441	23.7009	29.6134	27.0861	10.0861	0.000919957	0.135448
	G10		17.1359	17.0976	17.5599	17.6472		17.3601	0.360136	0.779091	27.0596	23.5414	29.5134	26.7048	9.7048	0.00119829	0.153807
	H04	ZouTai	16.9251	16.7098	17.1395	17.3855		17.04	0.0399831	0.972666	28.0726	23.9006	29.3587	27.1107	10.1107	0.000904456	0.0929872	0.0899528	0.0163267
	H05		16.318	17.564	17.6472	18.1498		17.4198	0.419766	0.747546	28.7039	23.6679	29.651	27.3409	10.3409	0.000771045	0.103143
	H06		15.7474	15.6495	15.6495	16.0418		15.7721	-1.22795	2.34234	29.502	23.8206	29.2332	27.5186	10.5186	0.000681683	0.0291027
	H07		16.4557	16.6841	16.7539	16.8409		16.6837	-0.316318	1.24515	27.4462	23.6225	29.0474	26.7054	9.70537	0.00119782	0.0961989
	H08		16.94	16.6009	17.0673	17.7514		17.0899	0.0899152	0.939578	27.1638	23.5326	29.3911	26.6958	9.69582	0.00120578	0.128332

## Sheet: Run Information
				=TTEST(B3:B7,C3:C7,2,2)
Group	average	average
10-Cont	18.8617	28.3931
	18.0544	27.5152
	18.1821	27.9942
	18.3849	28.4707
	17.1184	28.1807
ZouTai	16.3104	27.0905
	16.2441	27.9615
	13.7864	27.1654
	13.2317	27.588
	14.6188	27.6305
14-Cont	13.8388	24.0666
	16.3496	24.3259
	16.5529	23.3467
	13.232	25.1256
	15.8413	24.2755
ZouTai	15.1691	25.9163
	15.6955	23.8066
	16.0324	25.3621
	14.718	24.0301
	15.8615	24.4323
18-Cont	17.4778	22.3972
	16.1861	22.0036
	15.1909	22.3818
	14.2828	22.3549
	14.2741	22.5529
ZouTai	16.2682	22.31
	16.8696	21.7886
	16.9677	21.554
	17.7161	22.7464
	16.5258	23.1176
22-Cont	17.7222	24.6375
	16.4057	24.5253
	16.9641	25.9515
	17.3421	24.2952
	16.6193	24.0573
ZouTai	14.6451	24.7466
	15.4409	24.4582
	16.1826	24.5779
	15.6055	24.289
	16.9364	24.3077
2-Cont	15.2986	25.7566
	16.4246	26.4281
	17.1372	26.2383
	16.5433	25.5287
	16.7903	27.2208
ZouTai	16.2354	26.8401
	16.9626	26.6743
	17	26.4672
	15.887	26.7271
	16.6992	26.6181
6-Cont	17.4578	27.2073
	17.9683	26.8384
	16.0931	26.946
	17.5581	27.0861
	17.3601	26.7048
ZouTai	17.04	27.1107
	17.4198	27.3409
	15.7721	27.5186
	16.6837	26.7054
	17.0899	26.6958

## Sheet: Sheet2
Group	average	average
10-Cont	18.8617	28.3931	1.64212e-09
	18.0544	27.5152
	18.1821	27.9942
	18.3849	28.4707
	17.1184	28.1807
ZouTai	16.3104	27.0905	4.9253e-08
	16.2441	27.9615
	13.7864	27.1654
	13.2317	27.588
	14.6188	27.6305
14-Cont	13.8388	24.0666	1.80014e-06
	16.3496	24.3259
	16.5529	23.3467
	13.232	25.1256
	15.8413	24.2755
ZouTai	15.1691	25.9163	4.72886e-08
	15.6955	23.8066
	16.0324	25.3621
	14.718	24.0301
	15.8615	24.4323
18-Cont	17.4778	22.3972	3.86507e-06
	16.1861	22.0036
	15.1909	22.3818
	14.2828	22.3549
	14.2741	22.5529
ZouTai	16.2682	22.31
	16.8696	21.7886
	16.9677	21.554
	17.7161	22.7464
	16.5258	23.1176
22-Cont	17.7222	24.6375
	16.4057	24.5253
	16.9641	25.9515
	17.3421	24.2952
	16.6193	24.0573
ZouTai	14.6451	24.7466
	15.4409	24.4582
	16.1826	24.5779
	15.6055	24.289
	16.9364	24.3077
2-Cont	15.2986	25.7566
	16.4246	26.4281
	17.1372	26.2383
	16.5433	25.5287
	16.7903	27.2208
ZouTai	16.2354	26.8401
	16.9626	26.6743
	17	26.4672
	15.887	26.7271
	16.6992	26.6181
6-Cont	17.4578	27.2073
	17.9683	26.8384
	16.0931	26.946
	17.5581	27.0861
	17.3601	26.7048
ZouTai	17.04	27.1107
	17.4198	27.3409
	15.7721	27.5186
	16.6837	26.7054
	17.0899	26.6958
