# Supplementary material for: The Tibetan medicine Zuotai influences clock gene expression in the liver of mice
Source: PeerJ. 2016 Jan 26;4:e1632. doi: 10.7717/peerj.1632 (PMC4741069; doi:10.7717/peerj.1632)
Supplement: Supplemental Information 11 — Per2 raw data. [file peerj-04-1632-s011.xlsx]

## Sheet: 0
			Liv-B-actin					B-actin					Per2
		Group					average	2015-09-17	average	dCt	2^(-dCt)	Old	New	average	dCt	2^(-dCt)	%B-actinx100	Mean	SEM
	A03	10-Cont	18.2357	18.8895	19.0141	19.3075	18.7131	19.4741	19.0936	2.0936	0.234295	27.3577	25.608	26.4829	9.48287	0.00139757	59.6499	47.1768	10.5821		Cont-5		佐太-17
	A04		17.7402	17.9786	18.1217	18.377	17.9469	18.3362	18.1415	1.14154	0.453274	25.5026	24.6441	25.0734	8.07336	0.0037126	81.9063			6	47.7571	7.93259	47.752	10.0894	5.40781
	A05		17.3937	18.21	18.3044	18.8204	17.9693	18.5086	18.239	1.23897	0.423676	26.4457	26.1134	26.2795	9.27953	0.0016091	37.9795			10	47.1768	10.5821	12.8296	3.18661	16.8705
	A06		18.1557	17.8527	18.513	19.0181	18.1738	17.5055	17.8396	0.839633	0.558786	27.466	24.5125	25.9893	8.98928	0.0019677	35.2138			14	31.4401	8.38243	41.9068	11.0033
	A07		16.2077	17.183	17.3213	17.7615	16.904	19.4933	18.1986	1.19863	0.435688	26.8213	27.3483	27.0848	10.0848	0.000920799	21.1344			18	55.5462	7.25717	114.713	15.5972
	B01	ZouTai	15.6296	16.5081	16.0785	17.0254	16.0721	18.5304	17.3012	0.301229	0.811561	26.5742	26.2486	26.4114	9.41136	0.00146858	18.0957	12.8296	3.18661	22	168.636	29.9483	138.411	15.5972
	B02		15.2468	16.1346	16.6931	16.902	16.0248	18.2436	17.1342	0.13422	0.911162	26.4127	25.4515	25.9321	8.93212	0.00204722	22.4682			2	170.022	32.0529	216.443	44.8616
	B03		12.7732	13.9298	14.1455	14.2972	13.6162	18.38	15.9981	-1.00194	2.00269	26.5736	25.4278	26.0007	9.00072	0.00195215	9.74763			6	47.7571	7.93259	47.752	10.0894
	B04		12.3262	13.2785	13.6178	13.7043	13.0742	18.0545	15.5643	-1.43566	2.70507	26.8577	26.0653	26.4615	9.46147	0.00141845	5.24367			10	47.1768	10.5821	12.8296	3.18661
	B05		13.7698	14.8257	15.2016	14.6781	14.599	18.2787	16.4389	-0.561109	1.4754	27.0841	26.1628	26.6234	9.62344	0.00126781	8.59298			14	31.4401	8.38243	41.9068	11.0033
	B06	14-Cont	14.2094	13.3965	13.7906	13.9588	13.7988	18.4799	16.1394	-0.860642	1.81585	25.811	24.5687	25.1899	8.18989	0.0034245	18.859	31.4401	8.38243	18	55.5462	7.25717	114.713	15.5972
	B07		14.2658	16.7906	17.2349	17.107	16.0971	18.2657	17.1814	0.181417	0.881837	25.3916	24.5286	24.9601	7.96009	0.00401582	45.5393			22	168.636	29.9483	138.411	47.5727
	B08		16.0132	16.4662	16.8532	16.879	16.4442	17.9658	17.205	0.204975	0.867554	25.1902	24.2699	24.73	7.73005	0.00471003	54.291			2	170.022	32.0529	216.443	44.8616
	B09		11.0372	13.4881	14.176	14.2268	12.9004	20.9457	16.9231	-0.0769485	1.05478	26.4891	27.8792	27.1841	10.1841	0.000859548	8.14903			6	47.7571	0.0532568	47.752	10.0894
	B10		14.7872	15.4712	16.5901	16.5167	15.6162	18.6286	17.1224	0.122378	0.918672	25.7506	25.2212	25.4859	8.48588	0.0027893	30.3622
	C04	ZouTai	12.9567	15.063	16.2706	16.3859	14.7634	18.0065	16.385	-0.615045	1.53161	26.2117	24.7582	25.485	8.48495	0.0027911	18.2234	41.9068	11.0033
	C05		14.7627	15.808	16.126	16.0854	15.5656	18.1815	16.8736	-0.126449	1.0916	24.1903	23.364	23.7772	6.77717	0.00911736	83.5226
	C06		15.4441	15.3868	16.4195	16.8791	15.7501	18.1924	16.9713	-0.028741	1.02012	25.0985	24.6575	24.878	7.87796	0.00425107	41.6722
	C07		13.334	14.3756	15.444	15.7184	14.3845	17.0466	15.7156	-1.28445	2.43589	24.7055	23.3015	24.0035	7.0035	0.00779358	31.9948
	C08		13.7312	16.0038	16.708	17.0031	15.481	18.093	16.787	-0.212999	1.15909	25.196	24.7682	24.9821	7.98212	0.00395497	34.1212
	C09	18-Cont	17.4639	16.9006	17.5327	18.0138	17.2991	18.394	17.8466	0.846575	0.556103	27.3555	23.742	25.5488	8.5488	0.00267028	48.0176	55.5462	7.25717
	C10		15.5601	16.0874	16.4826	16.6143	16.0434	18.2781	17.1608	0.160763	0.894552	24.6811	23.4249	24.053	7.05303	0.00753055	84.1824
	C11		13.2845	15.4042	15.9402	16.1347	14.8763	18.1826	16.5294	-0.470556	1.38564	24.7011	23.4414	24.0712	7.07121	0.00743627	53.6665
	C12		12.8095	14.2913	15.0343	14.996	14.0451	18.4337	16.2394	-0.760645	1.69425	24.2523	23.8119	24.0321	7.03208	0.00764067	45.0977
	D01		14.0892	14.0536	14.2473	14.7061	14.1301	18.113	16.1215	-0.878486	1.83845	24.3319	23.3918	23.8618	6.86181	0.00859781	46.7668
	D07	ZouTai	16.1091	16.1609	16.3113	16.4913	16.1938	18.0227	17.1082	0.108217	0.927734	25.0123	23.6517	24.332	7.33202	0.00620642	66.8988	114.713	15.5972
	D08		15.1864	16.6533	17.9518	17.6871	16.5971	18.079	17.3381	0.338085	0.791091	24.6656	23.3159	23.9907	6.99073	0.00786285	99.3925
	D09		16.7567	16.6324	17.4171	17.0645	16.9354	18.2355	17.5854	0.585443	0.666445	23.856	23.2384	23.5472	6.54719	0.010693	160.448
	D10		17.3155	17.4774	18.1338	17.9375	17.6422	18.0713	17.8568	0.856777	0.552185	24.8354	23.7776	24.3065	7.30648	0.00631727	114.405
	D11		16.3585	16.2509	16.693	16.8008	16.4341	18.169	17.3016	0.301553	0.811379	24.0013	23.0793	23.5403	6.54029	0.0107443	132.42
	D12	22-Cont	17.0196	17.7575	18.0194	18.0924	17.5988	19.1728	18.3858	1.38584	0.382668	23.9039	23.2594	23.5816	6.58161	0.0104409	272.844	168.636	29.9483
	E01		14.9267	16.5472	17.0029	17.146	16.1589	18.6021	17.3805	0.380509	0.768167	23.4239	22.9191	23.1715	6.17152	0.0138735	180.606
	E02		15.8259	17.0785	17.5054	17.4467	16.8033	18.2727	17.538	0.537964	0.688742	25.689	22.627	24.158	7.15801	0.00700206	101.664
	E03		16.6502	17.1178	17.7631	17.8375	17.177	19.1485	18.1628	1.16276	0.446658	24.163	23.9008	24.0319	7.0319	0.00764165	171.085
	E04		15.4359	16.7402	17.0344	17.2666	16.4035	19.596	17.9997	0.99975	0.500087	24.5659	24.2688	24.4174	7.41736	0.00584997	116.979
	E10	ZouTai	12.6556	14.3627	15.7169	15.8452	14.2451	19.3147	16.7799	-0.220083	1.1648	24.2782	23.7467	24.0124	7.01243	0.00774547	66.4961	138.411	47.5727
	E11		14.4286	15.0018	16.1764	16.1568	15.2023	18.7472	16.9747	-0.0252688	1.01767	23.864	23.1912	23.5276	6.5276	0.0108391	106.51
	E12		15.8576	15.8369	16.5247	16.5111	16.0731	18.8085	17.4408	0.440772	0.73674	24.1501	23.3425	23.7463	6.74631	0.00931446	126.428
	F01		14.9357	15.4776	15.7809	16.2277	15.3981	18.718	17.058	0.0580346	0.960572	24.3531	24.1522	24.2527	7.25265	0.00655744	68.266
	F02		15.9243	16.8689	17.3043	17.6481	16.6992	18.6397	17.6694	0.669433	0.628754	22.8498	22.3816	22.6157	5.61571	0.020394	324.356
	F03	2-Cont	14.2471	15.5425	15.7326	15.6721	15.1741	18.9792	17.0766	0.0766244	0.948274	26.4413	23.2083	24.8248	7.82477	0.00441074	46.5133	170.022	32.0529
	F04		14.8582	16.6368	17.0716	17.1317	16.1889	18.9693	17.5791	0.579102	0.66938	23.8789	22.6712	23.275	6.27505	0.0129129	192.908
	F05		15.8783	17.177	17.765	17.7285	16.9401	18.7538	17.8469	0.846941	0.555962	23.8278	22.6796	23.2537	6.25374	0.013105	235.718
	F06		14.319	16.8029	17.4808	17.5704	16.2009	18.9439	17.5724	0.572428	0.672484	24.0007	22.5112	23.256	6.25596	0.0130848	194.575
	F07		15.3957	16.6191	17.7047	17.4418	16.5731	22.3279	19.4505	2.45053	0.182943	24.5992	25.8873	25.2432	8.24322	0.00330022	180.396
	G01	ZouTai	16.1861	16.0476	16.3173	16.3906	16.1837	19.2169	17.7003	0.700276	0.615455	24.2884	23.1093	23.6988	6.69881	0.00962625	156.409	216.443	44.8616
	G02		16.1379	16.3495	17.7525	17.6104	16.7466	19.0438	17.8952	0.895215	0.537667	24.1321	23.4922	23.8121	6.81213	0.00889909	165.513
	G03		17.0441	17.3085	18.0814	17.7819	17	18.8818	17.9409	0.940895	0.52091	23.2037	21.9955	22.5996	5.59959	0.0206231	395.906
	G04		15.8892	15.6996	15.9965	15.9629	15.8618	18.8522	17.357	0.356963	0.780807	23.5019	22.7481	23.125	6.12502	0.014328	183.503
	G05		16.0988	16.8704	16.4031	17.4244	16.4574	18.1537	17.3056	0.305585	0.809114	23.7109	22.4778	23.0944	6.09438	0.0146356	180.884
	G06	6-Cont	16.9715	17.0314	17.7493	18.079	17.2507	17.7897	17.5202	0.520229	0.697261	25.0515	24.045	24.5483	7.54828	0.00534247	76.6208	47.7571	7.93259
	G07		17.6358	17.446	18.2819	18.5095	17.7879	17.6814	17.7347	0.734654	0.600962	25.7935	24.8643	25.3289	8.32889	0.00310995	51.7495
	G08		15.7227	15.9015	16.2605	16.4878	15.9616	18.3742	17.1679	0.167867	0.890158	25.6661	24.9031	25.2846	8.28462	0.00320686	36.0257
	G09		17.3482	17.1227	17.6848	18.0766	17.3853	17.8403	17.6128	0.612784	0.653934	26.3516	25.4932	25.9224	8.92238	0.00206109	31.5183
	G10		17.1359	17.0976	17.5599	17.6472	17.2645	18.0754	17.67	0.669956	0.628526	25.9838	25.0877	25.5357	8.53573	0.00269456	42.8711
	H04	ZouTai	16.9251	16.7098	17.1395	17.3855	16.9248	17.2511	17.0879	0.0879332	0.94087	26.7325	25.0178	25.8752	8.87517	0.00212964	22.6348	47.752	10.0894
	H05		16.318	17.564	17.6472	18.1498	17.1764	17.7277	17.4521	0.452053	0.731002	25.8139	24.7091	25.2615	8.26149	0.0032587	44.5785
	H06		15.7474	15.6495	15.6495	16.0418	15.6821	17.9128	16.7975	-0.202517	1.1507	25.9496	24.3509	25.1502	8.15022	0.00351997	30.5897
	H07		16.4557	16.6841	16.7539	16.8409	16.6313	18.9804	17.8058	0.80584	0.572029	24.428	25.2145	24.8213	7.82127	0.00442142	77.2937
	H08		16.94	16.6009	17.0673	17.7514	16.8694	18.8724	17.8709	0.870892	0.546809	25.4578	24.8746	25.1662	8.16621	0.00348117	63.6634

## Sheet: Run Information
File Name	Arnt1-Liver_2014-11-09 21-21-21_BR003621.pcrd
Created By User	admin
Notes
ID
Run Started	11/09/2014 13:21:52 UTC
Run Ended	11/09/2014 14:27:50 UTC
Sample Vol	25
Lid Temp	105
Protocol File Name	百乐程序.prcl
Plate Setup File Name	Quick Plate_90-wells_SYBR Only.pltd
Base Serial Number	BR003621
Optical Head Serial Number	788BR03772
CFX Manager Version	3.1.1517.0823.
