# Supplementary material for: The Tibetan medicine Zuotai influences clock gene expression in the liver of mice
Source: PeerJ. 2016 Jan 26;4:e1632. doi: 10.7717/peerj.1632 (PMC4741069; doi:10.7717/peerj.1632)
Supplement: Supplemental Information 12 — Npas2 raw data. [file peerj-04-1632-s012.xlsx]

## Sheet: 0
			Liv-B-actin								nasp2	nasp2新逆转
		Group						average	dCt	2^(-dCt)	25.0099	28.2694		average	dCt	2^(-dCt)	%B-actin	Mean	SEM
	A03	10-Cont	18.2357	18.8895	19.0141	19.3075		18.8617	1.8617	0.275152	24.8574	27.3927	30.0999	27.45	10.45	0.000714902	0.259821	0.144023	0.0326996		Cont-12		佐太-116
	A04		17.7402	17.9786	18.1217	18.377		18.0544	1.0544	0.481498	24.9929	27.4644	30.1806	27.546	10.546	0.000668868	0.138914			6	0.0801621	0.013192	0.0566976	0.0209585			0.0359063
	A05		17.3937	18.21	18.3044	18.8204		18.1821	1.18211	0.440706	25.3635	26.9139	30.4445	27.574	10.574	0.000656006	0.148854			10	0.144023	0.0326996	0.0250194	0.00992028			0.324771
	A06		18.1557	17.8527	18.513	19.0181		18.3849	1.38488	0.382922	25.1274	28.8292	30.5339	28.1635	11.1635	0.000435955	0.113849			14	0.0325445	0.0102865	0.0164817	0.00584133
	A07		16.2077	17.183	17.3213	17.7615		17.1184	0.11838	0.921221	25.6789	27.8432	30.0376	27.8532	10.8532	0.000540567	0.0586794			18	0.00517135	0.0016655	0.00812558	0.00140035
	B01	ZouTai	15.6296	16.5081	16.0785	17.0254		16.3104	-0.689611	1.61285	25.2774	27.0344	30.6436	27.6518	10.6518	0.000621556	0.0385378	0.0250194	0.00992028	22	0.00341866	0.00103751	0.00204632	0.00140035
	B02		15.2468	16.1346	16.6931	16.902		16.2441	-0.755872	1.68865	26.473	27.5583	31.2145	27.0157	10.0157	0.00096601	0.057206			2	0.00423569	0.0017068	0.0136109	0.00776701
	B03		12.7732	13.9298	14.1455	14.2972		13.7864	-3.21359	9.27653	25.5062	27.1389	30.7149	26.3226	9.32257	0.00156181	0.0168361			6	0.0801621	0.013192	0.0566976	0.0209585
	B04		12.3262	13.2785	13.6178	13.7043		13.2317	-3.76829	13.626	26.4986	27.3597	30.3817	26.9292	9.92918	0.0010257	0.00752752			10	0.144023	0.0326996	0.0250194	0.00992028
	B05		13.7698	14.8257	15.2016	14.6781		14.6188	-2.38119	5.20965	27.542	30.2769	30.4427	28.9095	11.9095	0.000259951	0.0049898			14	0.0325445	0.0102865	0.0164817	0.00584133
	B06	14-Cont	14.2094	13.3965	13.7906	13.9588		13.8388	-3.16117	8.94552	25.482	28.3754	27.017	26.9581	9.95813	0.00100532	0.0112383	0.0325445	0.0102865	18	0.00517135	0.0016655	0.00812558	0.00140035
	B07		14.2658	16.7906	17.2349	17.107		16.3496	-0.650416	1.56962	26.3472	29.2131	27.0942	27.5515	10.5515	0.000666311	0.0424504			22	0.00341866	0.00103751	0.00204632	0.000538068
	B08		16.0132	16.4662	16.8532	16.879		16.5529	-0.447095	1.36329	26.7304	29.7715	25.945	27.4823	10.4823	0.000699058	0.0512772			2	0.00423569	0.0017068	0.0136109	0.00776701
	B09		11.0372	13.4881	14.176	14.2268		13.232	-3.76798	13.6231	26.7466	29.6126	26.9002	27.7531	10.7531	0.000579411	0.00425316			6	0.0801621	0.0532568	0.0566976	0.0209585
	B10		14.7872	15.4712	16.5901	16.5167		15.8413	-1.15871	2.23257	26.0022	27.6692	26.4567	26.7094	9.70937	0.0011945	0.0535035
	C04	ZouTai	12.9567	15.063	16.2706	16.3859		15.1691	-1.83094	3.55768	27.6339	29.5818	29.1693	28.795	11.795	0.000281415	0.00791007	0.0164817	0.00584133
	C05		14.7627	15.808	16.126	16.0854		15.6955	-1.30448	2.46995	26.7545	28.6809	26.4999	27.3118	10.3118	0.000786778	0.031854
	C06		15.4441	15.3868	16.4195	16.8791		16.0324	-0.967621	1.95561	26.8947	28.7306	27.7458	27.7904	10.7904	0.000564641	0.0288729
	C07		13.334	14.3756	15.444	15.7184		14.718	-2.282	4.86352	27.256	29.0847	27.0537	27.7981	10.7981	0.000561625	0.0115477
	C08		13.7312	16.0038	16.708	17.0031		15.8615	-1.13846	2.20146	31.9432	35.2603	26.7511	31.3182	14.3182	4.8955e-05	0.00222375
	C09	18-Cont	17.4639	16.9006	17.5327	18.0138		17.4778	0.477772	0.718086	31.8507	35.065	25.0554	30.657	13.657	7.7415e-05	0.0107807	0.00517135	0.0016655
	C10		15.5601	16.0874	16.4826	16.6143		16.1861	-0.813903	1.75796	32.5228	32.8638	24.5233	29.97	12.97	0.000124638	0.00708992
	C11		13.2845	15.4042	15.9402	16.1347		15.1909	-1.80912	3.50428		34.7228	25.1553	29.939	12.939	0.000127339	0.0036338
	C12		12.8095	14.2913	15.0343	14.996		14.2828	-2.7172	6.57597	31.3668	34.6252	24.7143	30.2354	13.2354	0.000103691	0.00157682
	D01		14.0892	14.0536	14.2473	14.7061		14.2741	-2.72594	6.61591	30.8391	32.295	25.0988	29.411	12.411	0.000183623	0.00277547
	D07	ZouTai	16.1091	16.1609	16.3113	16.4913		16.2682	-0.731848	1.66077	31.2889	32.5383	25.7415	29.8562	12.8562	0.000134863	0.00812053	0.00812558	0.00140035
	D08		15.1864	16.6533	17.9518	17.6871		16.8696	-0.130379	1.09458	31.6141	32.7127	26.1717	30.1662	13.1662	0.000108789	0.00993884
	D09		16.7567	16.6324	17.4171	17.0645		16.9677	-0.0323259	1.02266	31.3577	33.5656	25.1237	30.0156	13.0156	0.000120754	0.0118078
	D10		17.3155	17.4774	18.1338	17.9375		17.7161	0.716059	0.608758	35.3197	33.7575	25.2643	31.4472	14.4472	4.4768e-05	0.00735399
	D11		16.3585	16.2509	16.693	16.8008		16.5258	-0.474191	1.38914	34.4357	34.1752	25.4903	31.3671	14.3671	4.73239e-05	0.00340671
	D12	22-Cont	17.0196	17.7575	18.0194	18.0924		17.7222	0.722235	0.606158	33.4707	34.5158	27.0844	31.6903	14.6903	3.7825e-05	0.00624012	0.00341866	0.00103751
	E01		14.9267	16.5472	17.0029	17.146		16.4057	-0.594285	1.50972	34.0039		27.0351	30.5195	13.5195	8.51577e-05	0.00564061
	E02		15.8259	17.0785	17.5054	17.4467		16.9641	-0.0358635	1.02517	33.4475	36.4403	29.984	33.2906	16.2906	1.24749e-05	0.00121686
	E03		16.6502	17.1178	17.7631	17.8375		17.3421	0.342142	0.788869	34.3693	37.1812	27.129	32.8932	15.8932	1.64315e-05	0.00208292
	E04		15.4359	16.7402	17.0344	17.2666		16.6193	-0.380729	1.302	35.0015	35.1183	26.7599	32.2932	15.2932	2.49043e-05	0.00191278
	E10	ZouTai	12.6556	14.3627	15.7169	15.8452		14.6451	-2.35489	5.11557	35.2306	33.6216	27.4427	32.0983	15.0983	2.85078e-05	0.000557275	0.00204632	0.000538068
	E11		14.4286	15.0018	16.1764	16.1568		15.4409	-1.5591	2.94669		36.7226	27.1167	31.9197	14.9197	3.22653e-05	0.00109497
	E12		15.8576	15.8369	16.5247	16.5111		16.1826	-0.817429	1.76226	34.8647	30.2659	28.0394	31.0567	14.0567	5.86847e-05	0.00333008
	F01		14.9357	15.4776	15.7809	16.2277		15.6055	-1.39452	2.62901	33.9083	32.1376	27.2574	31.1011	14.1011	5.69048e-05	0.0021645
	F02		15.9243	16.8689	17.3043	17.6481		16.9364	-0.0636049	1.04507	34.343	34.2451	27.1745	31.9209	14.9209	3.22382e-05	0.00308478
	F03	2-Cont	14.2471	15.5425	15.7326	15.6721		15.2986	-1.70143	3.25224	32.5454	34.2451	28.6207	31.8038	14.8038	3.49642e-05	0.00107508	0.00423569	0.0017068
	F04		14.8582	16.6368	17.0716	17.1317		16.4246	-0.575406	1.4901	32.3697	34.6601	29.4956	32.1751	15.1751	2.70288e-05	0.0018139
	F05		15.8783	17.177	17.765	17.7285		17.1372	0.137202	0.909281		33.7173	29.4245	31.5709	14.5709	4.10891e-05	0.00451886
	F06		14.319	16.8029	17.4808	17.5704		16.5433	-0.456689	1.37239	31.3962	33.7173	29.4818	31.5317	14.5317	4.22196e-05	0.00307636
	F07		15.3957	16.6191	17.7047	17.4418		16.7903	-0.2097	1.15645	31.7548	28.8416	29.3471	29.9812	12.9812	0.000123674	0.0106943
	G01	ZouTai	16.1861	16.0476	16.3173	16.3906		16.2354	-0.764595	1.69889	31.2062	33.5253	29.9277	31.553	14.553	4.16004e-05	0.00244867	0.0136109	0.00776701
	G02		16.1379	16.3495	17.7525	17.6104		16.9626	-0.037437	1.02629	32.5533	33.5539	29.1354	31.7475	14.7475	3.63536e-05	0.00354224
	G03		17.0441	17.3085	18.0814	17.7819		17	0	1	29.66	31.3036	29.1049	30.0228	13.0228	0.000120154	0.0120154
	G04		15.8892	15.6996	15.9965	15.9629		15.887	-1.11295	2.16288	30.1578	30.3506	29.3103	29.9396	12.9396	0.000127293	0.00588535
	G05		16.0988	16.8704	16.4031	17.4244		16.6992	-0.300831	1.23185	26.1664	27.6072	29.7585	27.8441	10.8441	0.000544019	0.0441626
	G06	6-Cont	16.9715	17.0314	17.7493	18.079		17.4578	0.457792	0.7281	26.2424	26.1717	29.9715	27.4619	10.4619	0.000709034	0.0973814	0.0801621	0.013192
	G07		17.6358	17.446	18.2819	18.5095		17.9683	0.96831	0.511104	26.263	27.1804	29.8636	27.769	10.769	0.000573075	0.112125
	G08		15.7227	15.9015	16.2605	16.4878		16.0931	-0.906878	1.87498	26.4133	26.5195	29.6624	27.5317	10.5317	0.000675512	0.0360276
	G09		17.3482	17.1227	17.6848	18.0766		17.5581	0.558105	0.679194		26.6088	29.6134	28.1111	11.1111	0.000452083	0.0665617
	G10		17.1359	17.0976	17.5599	17.6472		17.3601	0.360136	0.779091	26.5931	26.3895	29.5134	27.4987	10.4987	0.000691171	0.088715
	H04	ZouTai	16.9251	16.7098	17.1395	17.3855		17.04	0.0399831	0.972666	26.4032	26.4517	29.3587	27.4046	10.4046	0.000737765	0.0758497	0.0566976	0.0209585
	H05		16.318	17.564	17.6472	18.1498		17.4198	0.419766	0.747546	25.5583	25.8875	29.651	27.0323	10.0323	0.00095497	0.127747
	H06		15.7474	15.6495	15.6495	16.0418		15.7721	-1.22795	2.34234	30.0652	27.332	29.2332	28.8768	11.8768	0.0002659	0.0113519
	H07		16.4557	16.6841	16.7539	16.8409		16.6837	-0.316318	1.24515	26.1206	27.8923	29.0474	27.6868	10.6868	0.000606691	0.0487243
	H08		16.94	16.6009	17.0673	17.7514		17.0899	0.0899152	0.939578			29.3911	29.3911	12.3911	0.000186174	0.0198146

## Sheet: Run Information
				=TTEST(B3:B7,C3:C7,2,2)
Group	average	average
10-Cont	18.8617	28.3931
	18.0544	27.5152
	18.1821	27.9942
	18.3849	28.4707
	17.1184	28.1807
ZouTai	16.3104	27.0905
	16.2441	27.9615
	13.7864	27.1654
	13.2317	27.588
	14.6188	27.6305
14-Cont	13.8388	24.0666
	16.3496	24.3259
	16.5529	23.3467
	13.232	25.1256
	15.8413	24.2755
ZouTai	15.1691	25.9163
	15.6955	23.8066
	16.0324	25.3621
	14.718	24.0301
	15.8615	24.4323
18-Cont	17.4778	22.3972
	16.1861	22.0036
	15.1909	22.3818
	14.2828	22.3549
	14.2741	22.5529
ZouTai	16.2682	22.31
	16.8696	21.7886
	16.9677	21.554
	17.7161	22.7464
	16.5258	23.1176
22-Cont	17.7222	24.6375
	16.4057	24.5253
	16.9641	25.9515
	17.3421	24.2952
	16.6193	24.0573
ZouTai	14.6451	24.7466
	15.4409	24.4582
	16.1826	24.5779
	15.6055	24.289
	16.9364	24.3077
2-Cont	15.2986	25.7566
	16.4246	26.4281
	17.1372	26.2383
	16.5433	25.5287
	16.7903	27.2208
ZouTai	16.2354	26.8401
	16.9626	26.6743
	17	26.4672
	15.887	26.7271
	16.6992	26.6181
6-Cont	17.4578	27.2073
	17.9683	26.8384
	16.0931	26.946
	17.5581	27.0861
	17.3601	26.7048
ZouTai	17.04	27.1107
	17.4198	27.3409
	15.7721	27.5186
	16.6837	26.7054
	17.0899	26.6958

## Sheet: Sheet2
Group	average	average
10-Cont	18.8617	28.3931	1.64212e-09
	18.0544	27.5152
	18.1821	27.9942
	18.3849	28.4707
	17.1184	28.1807
ZouTai	16.3104	27.0905	4.9253e-08
	16.2441	27.9615
	13.7864	27.1654
	13.2317	27.588
	14.6188	27.6305
14-Cont	13.8388	24.0666	1.80014e-06
	16.3496	24.3259
	16.5529	23.3467
	13.232	25.1256
	15.8413	24.2755
ZouTai	15.1691	25.9163	4.72886e-08
	15.6955	23.8066
	16.0324	25.3621
	14.718	24.0301
	15.8615	24.4323
18-Cont	17.4778	22.3972	3.86507e-06
	16.1861	22.0036
	15.1909	22.3818
	14.2828	22.3549
	14.2741	22.5529
ZouTai	16.2682	22.31
	16.8696	21.7886
	16.9677	21.554
	17.7161	22.7464
	16.5258	23.1176
22-Cont	17.7222	24.6375
	16.4057	24.5253
	16.9641	25.9515
	17.3421	24.2952
	16.6193	24.0573
ZouTai	14.6451	24.7466
	15.4409	24.4582
	16.1826	24.5779
	15.6055	24.289
	16.9364	24.3077
2-Cont	15.2986	25.7566
	16.4246	26.4281
	17.1372	26.2383
	16.5433	25.5287
	16.7903	27.2208
ZouTai	16.2354	26.8401
	16.9626	26.6743
	17	26.4672
	15.887	26.7271
	16.6992	26.6181
6-Cont	17.4578	27.2073
	17.9683	26.8384
	16.0931	26.946
	17.5581	27.0861
	17.3601	26.7048
ZouTai	17.04	27.1107
	17.4198	27.3409
	15.7721	27.5186
	16.6837	26.7054
	17.0899	26.6958
